# Supplementary material
Source: MDPI journal article supplement (https://www.mdpi.com/2306-5729/5/2/49)
Supplement: s1 [file s1]

**Table S1.** Species (synonymy used inside brackets), families, type of photoblasty, percentage of germination of diaspores in diffuse white light (Ld) or under plant canopy (Lp), result of significance tests (SIG) for the difference between Ld and Lp (\* significant, and *ns* not significant at  $P=0.05$ ), and source of germination data. Length (L), width (W), thickness (T), volume (VOL), departure from sphericity (VAR), relative amplitude of volume (AMP), and diaspore type.

| Species                                                                                                        | Family           | Photoblasty | Ld | Lp | SIG       | Source | L   | W   | T   | VOL   | VAR   | AMP    | Diaspore |
|----------------------------------------------------------------------------------------------------------------|------------------|-------------|----|----|-----------|--------|-----|-----|-----|-------|-------|--------|----------|
| <i>Achillea compacta</i> (= <i>A. coarctata</i> )                                                              | Asteraceae       | Positive    | 85 | 22 | *         | 5      | 1.0 | 0.4 | 0.2 | 0.048 | 0.109 | 1.735  | Fruit    |
| <i>Achillea millefolium</i>                                                                                    | Asteraceae       | Indifferent | 90 | 32 | *         | 4      | 1.8 | 0.5 | 0.3 | 0.143 | 0.133 | 3.614  | Seed     |
| <i>Achillea ptarmica</i>                                                                                       | Asteraceae       | Positive    | 73 | 0  | *         | 5      | 2.1 | 1.0 | 0.6 | 0.687 | 0.089 | 0.431  | Fruit    |
| <i>Ageratum houstonianum</i>                                                                                   | Asteraceae       | Indifferent | 65 | 65 | <i>ns</i> | 4      | 1.8 | 0.4 | 0.3 | 0.108 | 0.147 | 2.119  | Fruit    |
| <i>Agropyron repens</i> (= <i>Elymus repens</i> / <i>Elytrigia repens</i> )                                    | Poaceae          | Indifferent | 90 | 4  | *         | 4      | 4.2 | 1.0 | 0.7 | 1.499 | 0.143 | 23.033 | Fruit    |
| <i>Agrostemma githago</i>                                                                                      | Caryophyllaceae  | Indifferent | 73 | 61 | *         | 4      | 1.4 | 1.1 | 0.7 | 0.545 | 0.045 | 43.999 | Seed     |
| <i>Agrostis alba</i> (= <i>A. canina</i> / <i>A. gigantea</i> / <i>A. stolonifera</i> / <i>Poa nemoralis</i> ) | Poaceae          | Indifferent | 79 | 27 | *         | 5      | 0.9 | 0.3 | 0.2 | 0.024 | 0.125 | 19.189 | Fruit    |
| <i>Allium cepa</i>                                                                                             | Liliaceae        | Indifferent | 95 | 95 | <i>ns</i> | 5      | 2.8 | 1.8 | 0.8 | 2.221 | 0.082 | 1.274  | Seed     |
| <i>Allium fistulosum</i>                                                                                       | Liliaceae        | Indifferent | 72 | 70 | <i>ns</i> | 5      | 2.6 | 1.7 | 1.3 | 2.843 | 0.044 | 0.850  | Seed     |
| <i>Allium flavum</i>                                                                                           | Liliaceae        | Indifferent | 83 | 87 | <i>ns</i> | 5      | 3.0 | 1.5 | 1.1 | 2.652 | 0.073 | 0.047  | Seed     |
| <i>Allium montanum</i> var. <i>petraeum</i> (= <i>A. montanum</i> / <i>A. lusitanicum</i> )                    | Liliaceae        | Indifferent | 85 | 81 | <i>ns</i> | 5      | 2.5 | 1.7 | 0.8 | 1.769 | 0.078 | 0.661  | Seed     |
| <i>Allium porrum</i> (= <i>A. ampeloprasum</i> )                                                               | Liliaceae        | Negative    | 37 | 34 | <i>ns</i> | 3      | 2.3 | 1.5 | 1.1 | 1.918 | 0.050 | 1.007  | Seed     |
| <i>Allium schoenoprasum</i>                                                                                    | Liliaceae        | Negative    | 36 | 34 | <i>ns</i> | 4      | 2.7 | 1.2 | 0.8 | 1.370 | 0.091 | 0.756  | Seed     |
| <i>Alopecurus pratensis</i>                                                                                    | Poaceae          | Indifferent | 38 | 37 | <i>ns</i> | 5      | 2.4 | 1.2 | 0.8 | 1.197 | 0.081 | 3.636  | Fruit    |
| <i>Althaea rosea</i> (= <i>Alcea rosea</i> )                                                                   | Malvaceae        | Indifferent | 84 | 83 | <i>ns</i> | 3      | 2.4 | 2.4 | 1.1 | 3.362 | 0.063 | 1.427  | Seed     |
| <i>Alyssum maritimum</i> (= <i>Lobularia maritima</i> )                                                        | Brassicaceae     | Indifferent | 96 | 96 | <i>ns</i> | 4      | 1.3 | 0.9 | 0.5 | 0.329 | 0.057 | 1.042  | Seed     |
| <i>Amaranthus caudatus</i>                                                                                     | Amaranthaceae    | Negative    | 26 | 0  | *         | 4      | 0.9 | 0.9 | 0.5 | 0.224 | 0.038 | 3.442  | Seed     |
| <i>Anthirrinum maius</i> / <i>A. majus</i>                                                                     | Scrophulariaceae | Indifferent | 96 | 40 | *         | 4      | 0.9 | 0.6 | 0.4 | 0.115 | 0.062 | 0.337  | Seed     |
| <i>Apera spica-venti</i>                                                                                       | Poaceae          | Indifferent | 83 | 12 | *         | 4      | 2.1 | 0.3 | 0.1 | 0.039 | 0.183 | 0.838  | Fruit    |
| <i>Aquilegia vulgaris</i>                                                                                      | Ranunculaceae    | Indifferent | 45 | 20 | *         | 4      | 2.3 | 0.7 | 0.4 | 0.404 | 0.126 | 2.732  | Seed     |
| <i>Arabidopsis thaliana</i>                                                                                    | Brassicaceae     | Positive    | 45 | 2  | *         | 4      | 0.4 | 0.3 | 0.2 | 0.011 | 0.055 | 2.122  | Seed     |
| <i>Arabis albida</i> (= <i>A. alpina</i> / <i>A. caucasica</i> / <i>A. pieninica</i> )                         | Brassicaceae     | Indifferent | 93 | 80 | *         | 4      | 1.1 | 1.0 | 0.6 | 0.344 | 0.039 | 1.361  | Seed     |
| <i>Arabis allionii</i> (= <i>A. sudetica</i> )                                                                 | Brassicaceae     | Positive    | 26 | 4  | *         | 4      | 1.7 | 1.3 | 0.8 | 0.971 | 0.043 | 0.673  | Seed     |
| <i>Arabis alpina</i> (= <i>A. albida</i> / <i>A. caucasica</i> / <i>A. pieninica</i> )                         | Brassicaceae     | Positive    | 90 | 62 | *         | 4      | 1.1 | 1.0 | 0.6 | 0.344 | 0.039 | 1.361  | Seed     |
| <i>Arabis bellidifolia</i> (= <i>A. jacquinii</i> / <i>A. soyeri</i> )                                         | Brassicaceae     | Indifferent | 65 | 13 | *         | 4      | 1.5 | 1.0 | 0.6 | 0.478 | 0.059 | 2.805  | Seed     |
| <i>Arabis hirsuta</i>                                                                                          | Brassicaceae     | Positive    | 98 | 10 | *         | 4      | 1.0 | 0.6 | 0.3 | 0.109 | 0.072 | 2.510  | Seed     |
| <i>Arabis jacquinii</i> (= <i>A. bellidifolia</i> / <i>A. soyeri</i> )                                         | Brassicaceae     | Indifferent | 30 | 14 | *         | 4      | 1.5 | 1.0 | 0.6 | 0.478 | 0.059 | 2.805  | Seed     |
| <i>Arabis pieninica</i> (= <i>A. albida</i> / <i>A. alpina</i> / <i>A. caucasica</i> )                         | Brassicaceae     | Indifferent | 94 | 70 | *         | 5      | 1.1 | 1.0 | 0.6 | 0.344 | 0.039 | 1.361  | Seed     |
| <i>Arabis procurrens</i>                                                                                       | Brassicaceae     | Positive    | 70 | 32 | *         | 5      | 1.0 | 0.6 | 0.3 | 0.109 | 0.072 | 1.362  | Seed     |
| <i>Arabis vochinensis</i> (= <i>A. procurrens</i> )                                                            | Brassicaceae     | Indifferent | 72 | 8  | *         | 4      | 1.0 | 0.6 | 0.3 | 0.109 | 0.072 | 1.362  | Seed     |
| <i>Arctium lappa</i>                                                                                           | Asteraceae       | Positive    | 72 | 2  | *         | 5      | 4.1 | 1.7 | 0.8 | 2.910 | 0.115 | 5.829  | Fruit    |

Table S1 (continued)

| Species                                                               | Family          | Photoblasty | Ld  | Lp | SIG | Source | L   | W   | T   | VOL    | VAR   | AMP    | Diaspore |
|-----------------------------------------------------------------------|-----------------|-------------|-----|----|-----|--------|-----|-----|-----|--------|-------|--------|----------|
| <i>Arenaria grandiflora</i> (=Cernohorskyia grandiflora)              | Caryophyllaceae | Indifferent | 97  | 40 | *   | 4      | 1.1 | 0.8 | 0.5 | 0.205  | 0.058 | 7.498  | Seed     |
| <i>Artemisia absinthium</i>                                           | Asteraceae      | Positive    | 67  | 0  | *   | 4      | 0.7 | 0.4 | 0.2 | 0.028  | 0.084 | 3.703  | Fruit    |
| <i>Artemisia vulgaris</i>                                             | Asteraceae      | Positive    | 30  | 0  | *   | 4      | 1.5 | 0.5 | 0.3 | 0.114  | 0.124 | 6.556  | Fruit    |
| <i>Asparagus officinalis</i>                                          | Liliaceae       | Negative    | 62  | 38 | *   | 4      | 2.8 | 2.8 | 1.3 | 5.377  | 0.063 | 2.034  | Seed     |
| <i>Aster alpinus</i>                                                  | Asteraceae      | Indifferent | 83  | 73 | ns  | 4      | 3.1 | 1.1 | 0.7 | 1.339  | 0.111 | 1.074  | Fruit    |
| <i>Avena fatua</i>                                                    | Poaceae         | Indifferent | 72  | 26 | *   | 4      | 6.1 | 1.3 | 0.6 | 2.643  | 0.159 | 38.720 | Fruit    |
| <i>Avena sativa</i> cv. Romulus (=A. sativa)                          | Poaceae         | Indifferent | 97  | 95 | ns  | 4      | 5.0 | 1.0 | 0.7 | 1.772  | 0.154 | 69.089 | Fruit    |
| <i>Beta vulgaris</i> ssp. cicla (=B. vulgaris)                        | Chenopodiaceae  | Indifferent | 82  | 85 | ns  | 4      | 1.5 | 1.3 | 0.8 | 0.845  | 0.035 | 16.366 | Fruit    |
| <i>Beta vulgaris</i> ssp. esculenta (=B. vulgaris)                    | Chenopodiaceae  | Indifferent | 83  | 85 | ns  | 4      | 1.5 | 1.3 | 0.8 | 0.845  | 0.035 | 16.366 | Fruit    |
| <i>Bidens cernuus</i>                                                 | Asteraceae      | Positive    | 25  | 7  | *   | 5      | 4.7 | 0.9 | 0.6 | 1.261  | 0.160 | 10.556 | Fruit    |
| <i>Brassica oleracea</i> var. gemmifera                               | Brassicaceae    | Indifferent | 99  | 88 | *   | 4      | 2.3 | 2.0 | 0.9 | 2.253  | 0.065 | 0.691  | Seed     |
| <i>Brassica oleracea</i> var. gongylodes                              | Brassicaceae    | Indifferent | 90  | 92 | ns  | 4      | 1.7 | 1.5 | 1.0 | 1.345  | 0.029 | 0.239  | Seed     |
| <i>Bromus secalinus</i>                                               | Poaceae         | Indifferent | 88  | 65 | *   | 4      | 4.5 | 1.5 | 0.7 | 2.396  | 0.133 | 2.459  | Fruit    |
| <i>Calendula officinalis</i>                                          | Asteraceae      | Indifferent | 84  | 70 | *   | 3      | 8.0 | 2.0 | 0.9 | 7.841  | 0.151 | 30.487 | Seed     |
| <i>Callistephus chinensis</i>                                         | Asteraceae      | Indifferent | 45  | 39 | *   | 4      | 3.8 | 1.7 | 0.8 | 2.689  | 0.110 | 0.566  | Fruit    |
| <i>Campanula alliariifolia</i>                                        | Campanulaceae   | Positive    | 94  | 80 | *   | 5      | 1.8 | 1.0 | 0.6 | 0.581  | 0.075 | 0.865  | Seed     |
| <i>Campanula carpatica</i>                                            | Campanulaceae   | Positive    | 41  | 29 | *   | 5      | 0.9 | 0.4 | 0.2 | 0.043  | 0.100 | 0.922  | Seed     |
| <i>Campanula carpatica</i> var. turbinata (=C. carpatica)             | Campanulaceae   | Positive    | 70  | 27 | *   | 5      | 0.9 | 0.4 | 0.2 | 0.043  | 0.100 | 0.922  | Seed     |
| <i>Campanula cochleariifolia</i>                                      | Campanulaceae   | Positive    | 77  | 7  | *   | 5      | 1.0 | 0.3 | 0.2 | 0.027  | 0.133 | 1.144  | Seed     |
| <i>Campanula glomerata</i> var. superba (=C. glomerata)               | Campanulaceae   | Indifferent | 80  | 80 | ns  | 5      | 0.9 | 0.6 | 0.3 | 0.089  | 0.070 | 4.851  | Seed     |
| <i>Campanula lactiflora</i>                                           | Campanulaceae   | Positive    | 81  | 8  | *   | 5      | 1.0 | 0.6 | 0.3 | 0.109  | 0.072 | 0.000  | Seed     |
| <i>Campanula latifolia</i>                                            | Campanulaceae   | Positive    | 90  | 24 | *   | 5      | 0.9 | 0.8 | 0.5 | 0.176  | 0.042 | 7.175  | Seed     |
| <i>Campanula patula</i>                                               | Campanulaceae   | Positive    | 77  | 7  | *   | 5      | 0.4 | 0.3 | 0.2 | 0.011  | 0.055 | 2.122  | Seed     |
| <i>Campanula persicifolia</i>                                         | Campanulaceae   | Positive    | 80  | 48 | *   | 5      | 0.7 | 0.4 | 0.2 | 0.033  | 0.077 | 6.070  | Seed     |
| <i>Campanula rotundifolia</i> (=C. moravica)                          | Campanulaceae   | Positive    | 100 | 3  | *   | 5      | 0.8 | 0.2 | 0.1 | 0.010  | 0.146 | 5.046  | Seed     |
| <i>Celosia cristata</i> (=C. argentea)                                | Amaranthaceae   | Indifferent | 98  | 97 | ns  | 4      | 1.3 | 1.0 | 0.6 | 0.411  | 0.048 | 1.610  | Seed     |
| <i>Centaurea cyanus</i> (=C. segetum)                                 | Asteraceae      | Indifferent | 70  | 6  | *   | 4      | 2.8 | 1.0 | 0.6 | 0.944  | 0.114 | 4.045  | Fruit    |
| <i>Centaurea kotschyana</i> (=Cyanus heuffeliana)                     | Asteraceae      | Indifferent | 42  | 19 | *   | 5      | 5.5 | 2.4 | 1.1 | 7.763  | 0.112 | 0.381  | Fruit    |
| <i>Centaurea macrocephala</i> (=Grossheimia macrocephala)             | Asteraceae      | Indifferent | 95  | 86 | ns  | 5      | 8.0 | 2.8 | 1.3 | 15.382 | 0.128 | 0.471  | Fruit    |
| <i>Centaurea rhenana</i> (=Acosta rhenana/C. biebersteinii/C. stoebe) | Asteraceae      | Indifferent | 88  | 38 | *   | 5      | 2.3 | 0.8 | 0.5 | 0.475  | 0.119 | 3.713  | Fruit    |
| <i>Cerastium arvense</i>                                              | Caryophyllaceae | Positive    | 92  | 13 | *   | 4      | 0.7 | 0.6 | 0.3 | 0.069  | 0.043 | 8.470  | Seed     |
| <i>Cerastium vulgatum</i> (C. caespitosum/C. glomeratum)              | Caryophyllaceae | Positive    | 98  | 3  | *   | 4      | 0.4 | 0.4 | 0.2 | 0.019  | 0.041 | 10.749 | Seed     |
| <i>Cheiranthus cheiri</i> (=Erysimum cheiri)                          | Brassicaceae    | Indifferent | 96  | 92 | ns  | 4      | 2.0 | 1.5 | 1.0 | 1.625  | 0.039 | 4.429  | Seed     |

Table S1 (continued)

| Species                                                                                 | Family          | Photoblasty | Ld | Lp  | SIG | Source | L   | W   | T   | VOL    | VAR   | AMP     | Diaspore |
|-----------------------------------------------------------------------------------------|-----------------|-------------|----|-----|-----|--------|-----|-----|-----|--------|-------|---------|----------|
| <i>Chelidonium majus</i>                                                                | Papaveraceae    | Negative    | 80 | 1   | *   | 4      | 1.1 | 0.7 | 0.4 | 0.141  | 0.073 | 6.281   | Seed     |
| <i>Chenopodium album</i>                                                                | Chenopodiaceae  | Positive    | 47 | 28  | *   | 4      | 1.4 | 0.6 | 0.3 | 0.148  | 0.099 | 13.498  | Fruit    |
| <i>Chrysanthemum parthenium</i> (=Pyrethrum parthenium/Tanacetum parthenium)            | Asteraceae      | Indifferent | 95 | 82  | *   | 3      | 1.4 | 0.4 | 0.2 | 0.067  | 0.136 | 1.782   | Fruit    |
| <i>Cichorium intybus</i>                                                                | Asteraceae      | Indifferent | 95 | 76  | *   | 3      | 1.7 | 0.7 | 0.4 | 0.259  | 0.107 | 9.223   | Fruit    |
| <i>Cineraria maritima</i> (=Senecio cineraria)                                          | Asteraceae      | Indifferent | 35 | 40  | ns  | 3      | 2.0 | 0.7 | 0.4 | 0.305  | 0.119 | 0.679   | Fruit    |
| <i>Cirsium oleraceum</i>                                                                | Asteraceae      | Positive    | 67 | 0   | *   | 5      | 4.8 | 1.5 | 0.7 | 2.645  | 0.137 | 0.472   | Fruit    |
| <i>Cirsium palustre</i>                                                                 | Asteraceae      | Positive    | 75 | 0   | *   | 5      | 3.0 | 1.2 | 0.8 | 1.549  | 0.100 | 1.067   | Fruit    |
| <i>Cucumis sativus</i> *                                                                | Cucurbitaceae   | Indifferent | 98 | 20  | *   | 3      | 8.7 | 3.9 | 0.9 | 16.275 | 0.136 | 3.170   | Seed     |
| <i>Dactylis glomerata</i>                                                               | Poaceae         | Positive    | 91 | 20  | *   | 3      | 2.5 | 0.8 | 0.5 | 0.512  | 0.125 | 5.254   | Fruit    |
| <i>Daucus carota</i> var. <i>carota</i> (=D. <i>carota</i> ) *                          | Apiaceae        | Indifferent | 80 | 85  | ns  | 4      | 2.2 | 1.0 | 0.6 | 0.631  | 0.100 | 22.788  | Fruit    |
| <i>Dianthus barbatus</i>                                                                | Caryophyllaceae | Indifferent | 96 | 95  | ns  | 4      | 2.0 | 1.4 | 0.9 | 1.383  | 0.047 | 0.491   | Seed     |
| <i>Dianthus carthusianorum</i>                                                          | Caryophyllaceae | Indifferent | 88 | 78  | ns  | 5      | 2.0 | 1.5 | 1.0 | 1.625  | 0.039 | 0.172   | Seed     |
| <i>Dianthus caryophyllus</i>                                                            | Caryophyllaceae | Indifferent | 84 | 84  | ns  | 4      | 2.8 | 1.8 | 0.8 | 2.221  | 0.082 | 0.761   | Seed     |
| <i>Dianthus compactus</i>                                                               | Caryophyllaceae | Positive    | 86 | 63  | *   | 5      | 2.8 | 2.1 | 1.0 | 3.024  | 0.071 | 0.493   | Seed     |
| <i>Dianthus deltoides</i>                                                               | Caryophyllaceae | Indifferent | 96 | 83  | *   | 5      | 1.1 | 0.7 | 0.4 | 0.164  | 0.067 | 2.114   | Seed     |
| <i>Dianthus gratianopolitanus</i>                                                       | Caryophyllaceae | Indifferent | 98 | 101 | ns  | 5      | 2.7 | 1.8 | 0.8 | 2.142  | 0.079 | 0.715   | Seed     |
| <i>Dianthus kitaibelii</i> (=D. <i>petraeus</i> )                                       | Caryophyllaceae | Positive    | 83 | 32  | *   | 5      | 2.9 | 1.2 | 0.8 | 1.489  | 0.097 | 0.690   | Seed     |
| <i>Dianthus petraeus</i>                                                                | Caryophyllaceae | Indifferent | 84 | 68  | *   | 5      | 2.9 | 1.2 | 0.8 | 1.489  | 0.097 | 0.690   | Seed     |
| <i>Dianthus plumarius</i> (=D. <i>lumnitzeri</i> )                                      | Caryophyllaceae | Indifferent | 90 | 97  | ns  | 5      | 3.0 | 2.4 | 1.1 | 4.232  | 0.068 | 0.543   | Seed     |
| <i>Dianthus sinensis</i> (=D. <i>chinensis</i> /D. <i>versicolor</i> )                  | Caryophyllaceae | Indifferent | 98 | 93  | *   | 3      | 0.5 | 0.4 | 0.2 | 0.024  | 0.059 | 139.000 | Seed     |
| <i>Dianthus spiculifolius</i>                                                           | Caryophyllaceae | Indifferent | 99 | 87  | *   | 5      | 3.0 | 1.8 | 0.8 | 2.380  | 0.087 | 0.543   | Seed     |
| <i>Digitalis purpurea</i>                                                               | Plantaginaceae  | Indifferent | 98 | 97  | ns  | 3      | 0.6 | 0.4 | 0.2 | 0.027  | 0.063 | 2.189   | Seed     |
| <i>Dimorphotheca aurantiaca</i>                                                         | Asteraceae      | Indifferent | 37 | 27  | *   | 4      | 4.7 | 1.6 | 0.7 | 2.809  | 0.131 | 27.511  | Fruit    |
| <i>Elsholtzia patrini</i> (=E. <i>ciliata</i> )                                         | Lamiaceae       | Positive    | 98 | 2   | *   | 5      | 1.1 | 0.6 | 0.3 | 0.120  | 0.081 | 1.315   | Fruit    |
| <i>Epilobium montanum</i>                                                               | Oenotheraceae   | Positive    | 94 | 0   | *   | 5      | 1.0 | 0.4 | 0.2 | 0.048  | 0.109 | 0.728   | Fruit    |
| <i>Erigeron alpinus</i>                                                                 | Asteraceae      | Indifferent | 90 | 10  | *   | 4      | 2.6 | 0.5 | 0.3 | 0.199  | 0.161 | 0.576   | Fruit    |
| <i>Erigeron canadensis</i> (=Conyza canadensis)                                         | Asteraceae      | Indifferent | 45 | 43  | ns  | 4      | 1.1 | 0.3 | 0.2 | 0.030  | 0.139 | 7.109   | Fruit    |
| <i>Eschscholzia californica</i>                                                         | Papaveraceae    | Negative    | 28 | 14  | *   | 4      | 1.5 | 1.4 | 0.9 | 1.081  | 0.028 | 0.309   | Seed     |
| <i>Festuca duriuscula</i> (=F. <i>cinerea</i> /F. <i>nigrescens</i> / F. <i>rubra</i> ) | Poaceae         | Indifferent | 95 | 92  | ns  | 5      | 2.4 | 0.6 | 0.4 | 0.268  | 0.144 | 10.252  | Fruit    |
| <i>Festuca pallens</i>                                                                  | Poaceae         | Indifferent | 38 | 28  | *   | 5      | 3.3 | 0.8 | 0.5 | 0.691  | 0.145 | 0.473   | Fruit    |
| <i>Festuca rubra</i> (=F. <i>cinerea</i> /F. <i>duriuscula</i> /F. <i>nigrescens</i> )  | Poaceae         | Positive    | 81 | 70  | *   | 3      | 2.4 | 0.6 | 0.4 | 0.268  | 0.144 | 10.252  | Fruit    |
| <i>Festuca sulcata</i> (=F. <i>rupicola</i> )                                           | Poaceae         | Indifferent | 26 | 15  | *   | 4      | 2.4 | 0.7 | 0.4 | 0.369  | 0.133 | 0.506   | Fruit    |
| <i>Festuca varia</i> (=F. <i>esikia</i> /F. <i>versicolor</i> )                         | Poaceae         | Indifferent | 32 | 25  | *   | 4      | 2.7 | 0.9 | 0.6 | 0.718  | 0.121 | 1.327   | Fruit    |
| <i>Galinsoga parviflora</i>                                                             | Asteraceae      | Positive    | 66 | 3   | *   | 4      | 1.3 | 0.5 | 0.3 | 0.100  | 0.113 | 11.221  | Fruit    |
| <i>Galinsoga quadriradiata</i>                                                          | Asteraceae      | Positive    | 87 | 0   | *   | 5      | 0.7 | 0.2 | 0.1 | 0.013  | 0.122 | 23.951  | Fruit    |

Table S1 (continued)

| Species                                                                           | Family           | Photoblasty | Ld  | Lp | SIG | Source | L   | W   | T   | VOL    | VAR   | AMP    | Diaspore |
|-----------------------------------------------------------------------------------|------------------|-------------|-----|----|-----|--------|-----|-----|-----|--------|-------|--------|----------|
| <i>Gypsophila elegans</i>                                                         | Caryophyllaceae  | Indifferent | 86  | 80 | ns  | 4      | 1.0 | 0.8 | 0.5 | 0.196  | 0.048 | 6.799  | Seed     |
| <i>Helichrysum bracteatum</i>                                                     | Asteraceae       | Indifferent | 96  | 93 | ns  | 4      | 2.0 | 0.9 | 0.6 | 0.519  | 0.095 | 1.439  | Fruit    |
| <i>Hordeum jubatum</i>                                                            | Poaceae          | Indifferent | 93  | 88 | ns  | 4      | 3.4 | 1.1 | 0.7 | 1.463  | 0.120 | 1.825  | Fruit    |
| <i>Hordeum vulgare</i> cv. Elgina (=H. distichon/H. vulgare)                      | Poaceae          | Indifferent | 62  | 68 | ns  | 3      | 7.5 | 2.7 | 1.3 | 13.130 | 0.127 | 4.039  | Fruit    |
| <i>Hypericum perforatum</i>                                                       | Guttiferae       | Positive    | 100 | 7  | *   | 5      | 0.7 | 0.3 | 0.1 | 0.013  | 0.119 | 9.056  | Seed     |
| <i>Hypochoeris radicata</i>                                                       | Asteraceae       | Positive    | 82  | 6  | *   | 5      | 3.4 | 0.5 | 0.3 | 0.236  | 0.176 | 4.309  | Fruit    |
| <i>Impatiens balsamina</i>                                                        | Balsaminaceae    | Indifferent | 90  | 93 | ns  | 3      | 1.8 | 1.5 | 1.0 | 1.437  | 0.032 | 8.611  | Seed     |
| <i>Ipomoea hederacea</i> (=I. nil) *                                              | Convolvulaceae   | Indifferent | 97  | 97 | ns  | 5      | 2.5 | 1.8 | 1.7 | 4.051  | 0.020 | 9.858  | Seed     |
| <i>Ipomoea purpurea</i>                                                           | Convolvulaceae   | Indifferent | 98  | 91 | ns  | 5      | 4.0 | 2.0 | 0.9 | 3.919  | 0.101 | 6.474  | Seed     |
| <i>Ipomoea rubro-coerulea</i> (=I. tricolor/I. violacea)                          | Convolvulaceae   | Indifferent | 71  | 82 | ns  | 5      | 6.0 | 3.6 | 1.7 | 18.597 | 0.087 | 0.631  | Seed     |
| <i>Juncus articulatus</i>                                                         | Juncaceae        | Positive    | 53  | 0  | *   | 5      | 0.5 | 0.3 | 0.1 | 0.008  | 0.080 | 1.400  | Seed     |
| <i>Juncus bufonius</i>                                                            | Juncaceae        | Positive    | 53  | 0  | *   | 5      | 0.3 | 0.2 | 0.1 | 0.004  | 0.064 | 19.076 | Seed     |
| <i>Juncus squarrosus</i>                                                          | Juncaceae        | Positive    | 90  | 3  | *   | 5      | 0.7 | 0.5 | 0.3 | 0.052  | 0.058 | 0.144  | Seed     |
| <i>Lactuca sativa</i> cv. Cud Vorburgu (=L. sativa)                               | Asteraceae       | Indifferent | 97  | 14 | *   | 3      | 2.9 | 1.0 | 0.6 | 0.954  | 0.119 | 1.931  | Fruit    |
| <i>Lactuca serriola</i>                                                           | Asteraceae       | Indifferent | 100 | 10 | *   | 4      | 2.7 | 0.8 | 0.5 | 0.545  | 0.133 | 6.013  | Fruit    |
| <i>Lapsana communis</i>                                                           | Asteraceae       | Positive    | 58  | 0  | *   | 5      | 2.8 | 0.7 | 0.4 | 0.435  | 0.144 | 4.163  | Fruit    |
| <i>Leontodon autumnalis</i>                                                       | Asteraceae       | Indifferent | 80  | 28 | *   | 4      | 5.2 | 0.5 | 0.3 | 0.411  | 0.190 | 1.519  | Fruit    |
| <i>Leontodon hispidus</i>                                                         | Asteraceae       | Positive    | 70  | 35 | *   | 4      | 6.0 | 0.6 | 0.4 | 0.709  | 0.188 | 1.673  | Fruit    |
| <i>Lepidium sativum</i>                                                           | Brassicaceae     | Indifferent | 94  | 96 | ns  | 4      | 1.8 | 0.9 | 0.5 | 0.462  | 0.084 | 5.743  | Seed     |
| <i>Lobelia erinus</i>                                                             | Lobeliaceae      | Indifferent | 92  | 72 | *   | 4      | 0.5 | 0.3 | 0.2 | 0.013  | 0.073 | 1.138  | Seed     |
| <i>Lolium multiflorum</i>                                                         | Poaceae          | Indifferent | 93  | 70 | *   | 5      | 5.1 | 1.4 | 0.6 | 2.277  | 0.147 | 2.444  | Fruit    |
| <i>Lolium perenne</i>                                                             | Poaceae          | Indifferent | 84  | 82 | ns  | 5      | 3.8 | 0.7 | 0.4 | 0.507  | 0.165 | 14.470 | Fruit    |
| <i>Lupinus polyphyllus</i>                                                        | Fabaceae         | Indifferent | 37  | 22 | *   | 5      | 4.2 | 3.0 | 1.4 | 9.264  | 0.074 | 2.730  | Seed     |
| <i>Lycopersicon esculentum</i> (=L. lycopersicum)                                 | Solanaceae       | Negative    | 48  | 6  | *   | 3      | 2.9 | 2.2 | 1.0 | 3.424  | 0.071 | 1.752  | Seed     |
| <i>Matricaria inodora</i> (=M. perforata/Tripleurospermum inodorum/T. verforatum) | Asteraceae       | Positive    | 50  | 14 | *   | 4      | 1.3 | 0.5 | 0.3 | 0.098  | 0.112 | 30.763 | Fruit    |
| <i>Matthiola bicornis</i>                                                         | Brassicaceae     | Positive    | 78  | 50 | *   | 3      | 1.4 | 1.0 | 0.6 | 0.455  | 0.056 | 0.533  | Seed     |
| <i>Matthiola incana</i>                                                           | Brassicaceae     | Indifferent | 88  | 78 | ns  | 4      | 1.9 | 1.8 | 0.8 | 1.505  | 0.063 | 3.688  | Seed     |
| <i>Melandrium album</i> (=Silene latifolia)                                       | Caryophyllaceae  | Indifferent | 36  | 7  | *   | 4      | 1.2 | 0.8 | 0.5 | 0.237  | 0.062 | 5.461  | Seed     |
| <i>Melandrium rubrum</i> (=Silene dioica)                                         | Caryophyllaceae  | Positive    | 37  | 0  | *   | 4      | 1.4 | 0.9 | 0.5 | 0.356  | 0.064 | 2.277  | Seed     |
| <i>Melilotus albus</i> (=M. alba)                                                 | Fabaceae         | Indifferent | 57  | 50 | ns  | 5      | 2.0 | 1.0 | 0.6 | 0.652  | 0.084 | 2.415  | Seed     |
| <i>Mesembryanthemum crystallinum</i> (=Cryophytum crystallinum)                   | Aizoaceae        | Indifferent | 99  | 98 | ns  | 4      | 0.9 | 0.8 | 0.5 | 0.176  | 0.042 | 0.770  | Seed     |
| <i>Nemesia strumosa</i>                                                           | Scrophulariaceae | Negative    | 82  | 66 | *   | 4      | 1.0 | 0.5 | 0.3 | 0.075  | 0.089 | 2.007  | Seed     |

Table S1 (continued)

| Species                                                                                              | Family         | Photoblasty | Ld | Lp | SIG | Source | L   | W   | T   | VOL   | VAR   | AMP     | Diaspore |
|------------------------------------------------------------------------------------------------------|----------------|-------------|----|----|-----|--------|-----|-----|-----|-------|-------|---------|----------|
| <i>Nicotiana rustica</i> cv. Pomorski (=N. <i>rustica</i> )                                          | Solanaceae     | Indifferent | 79 | 61 | *   | 3      | 0.8 | 0.6 | 0.3 | 0.087 | 0.054 | 4.504   | Seed     |
| <i>Nicotiana tabacum</i> cv. Kentucky 10 (=N. <i>tabacum</i> )                                       | Solanaceae     | Positive    | 98 | 45 | *   | 3      | 0.6 | 0.4 | 0.2 | 0.029 | 0.064 | 2.027   | Seed     |
| <i>Nigella damascena</i>                                                                             | Ranunculaceae  | Negative    | 60 | 37 | *   | 4      | 2.9 | 1.7 | 0.8 | 2.137 | 0.085 | 0.375   | Seed     |
| <i>Panicum crus-galli</i> (=Echinochloa <i>crus-galli</i> )                                          | Poaceae        | Indifferent | 90 | 82 | *   | 4      | 2.0 | 0.7 | 0.4 | 0.282 | 0.119 | 11.943  | Seed     |
| <i>Papaver orientale</i>                                                                             | Papaveraceae   | Indifferent | 96 | 74 | *   | 4      | 1.0 | 0.7 | 0.4 | 0.149 | 0.059 | 0.725   | Seed     |
| <i>Petasites hybridus</i>                                                                            | Asteraceae     | Indifferent | 96 | 14 | *   | 4      | 2.4 | 0.4 | 0.2 | 0.116 | 0.168 | 0.850   | Fruit    |
| <i>Petunia hybrida</i> (=P. $\times$ <i>hybrida</i> )                                                | Solanaceae     | Indifferent | 70 | 39 | *   | 3      | 0.7 | 0.6 | 0.3 | 0.076 | 0.046 | 0.566   | Seed     |
| <i>Phacelia tanacetifolia</i>                                                                        | Boraginaceae   | Negative    | 13 | 14 | ns  | 3      | 3.2 | 1.0 | 0.7 | 1.097 | 0.124 | 1.418   | Seed     |
| <i>Phalaris arundinacea</i> (=Phalaroides <i>arundinacea</i> )                                       | Poaceae        | Negative    | 82 | 20 | *   | 5      | 1.1 | 0.8 | 0.5 | 0.216 | 0.055 | 9.690   | Fruit    |
| <i>Phleum pratense</i> (=Phleum <i>rhaeticum</i> )                                                   | Poaceae        | Indifferent | 90 | 35 | *   | 3      | 1.5 | 0.5 | 0.3 | 0.114 | 0.124 | 4.738   | Fruit    |
| <i>Phyteuma orbiculare</i>                                                                           | Campanulaceae  | Positive    | 97 | 0  | *   | 5      | 1.2 | 0.1 | 0.0 | 0.001 | 0.205 | 231.310 | Seed     |
| <i>Phyteuma scheuchzeri</i>                                                                          | Campanulaceae  | Positive    | 83 | 62 | *   | 5      | 0.8 | 0.3 | 0.2 | 0.021 | 0.115 | 1.007   | Seed     |
| <i>Plantago lanceolata</i>                                                                           | Plantaginaceae | Indifferent | 70 | 72 | ns  | 4      | 2.0 | 0.8 | 0.5 | 0.404 | 0.107 | 12.763  | Seed     |
| <i>Plantago major</i>                                                                                | Plantaginaceae | Positive    | 68 | 2  | *   | 4      | 0.5 | 0.3 | 0.2 | 0.016 | 0.075 | 35.813  | Seed     |
| <i>Plantago media</i>                                                                                | Plantaginaceae | Positive    | 30 | 1  | *   | 4      | 1.8 | 0.8 | 0.5 | 0.362 | 0.098 | 1.846   | Seed     |
| <i>Plantago ramosa</i> (=P. <i>indica</i> /P. <i>scabra</i> )                                        | Plantaginaceae | Indifferent | 88 | 13 | *   | 5      | 2.0 | 1.0 | 0.6 | 0.652 | 0.084 | 6.518   | Seed     |
| <i>Platycodon grandiflorus</i> (=P. <i>grandiflorum</i> )                                            | Campanulaceae  | Positive    | 87 | 63 | *   | 5      | 2.2 | 1.0 | 0.6 | 0.723 | 0.093 | 0.735   | Seed     |
| <i>Poa alpina</i> (=P. <i>badensis</i> /P. <i>molinerii</i> )                                        | Poaceae        | Indifferent | 40 | 42 | ns  | 4      | 1.2 | 0.5 | 0.3 | 0.091 | 0.105 | 10.600  | Fruit    |
| <i>Poa alpina</i> var. <i>vivipara</i> (=P. <i>alpina</i> /P. <i>badensis</i> /P. <i>molinerii</i> ) | Poaceae        | Indifferent | 95 | 84 | *   | 4      | 1.2 | 0.5 | 0.3 | 0.091 | 0.105 | 10.600  | Fruit    |
| <i>Poa palustris</i>                                                                                 | Poaceae        | Negative    | 35 | 20 | *   | 5      | 1.4 | 0.4 | 0.2 | 0.067 | 0.136 | 2.853   | Fruit    |
| <i>Poa pratensis</i>                                                                                 | Poaceae        | Positive    | 44 | 5  | *   | 3      | 1.5 | 0.5 | 0.3 | 0.114 | 0.124 | 7.980   | Fruit    |
| <i>Poa trivialis</i>                                                                                 | Poaceae        | Positive    | 80 | 0  | *   | 5      | 1.5 | 0.4 | 0.2 | 0.072 | 0.141 | 6.621   | Fruit    |
| <i>Polygonum convolvulus</i> (=Fallopia <i>convolvulus</i> )                                         | Polygonaceae   | Indifferent | 78 | 66 | *   | 3      | 2.6 | 1.9 | 0.9 | 2.234 | 0.074 | 5.324   | Fruit    |
| <i>Polygonum nodosum</i> (=Persicaria <i>lapathifolia</i> )                                          | Polygonaceae   | Indifferent | 50 | 49 | ns  | 4      | 2.0 | 1.5 | 1.0 | 1.625 | 0.039 | 1.826   | Fruit    |
| <i>Polygonum tomentosum</i> (=Persicaria <i>lapathifolia</i> )                                       | Polygonaceae   | Positive    | 50 | 7  | *   | 5      | 2.0 | 1.5 | 1.0 | 1.625 | 0.039 | 1.826   | Fruit    |
| <i>Prenanthes purpurea</i>                                                                           | Asteraceae     | Positive    | 45 | 4  | *   | 4      | 5.0 | 1.1 | 0.8 | 2.317 | 0.146 | 0.179   | Fruit    |
| <i>Prunella vulgaris</i>                                                                             | Lamiaceae      | Positive    | 75 | 13 | *   | 5      | 1.6 | 0.9 | 0.5 | 0.409 | 0.075 | 1.380   | Fruit    |
| <i>Quamoclit coccinea</i>                                                                            | Convolvulaceae | Indifferent | 83 | 90 | ns  | 5      | 3.4 | 2.2 | 1.0 | 4.065 | 0.081 | 1.470   | Seed     |
| <i>Ranunculus acris</i>                                                                              | Ranunculaceae  | Positive    | 43 | 0  | *   | 5      | 2.2 | 1.5 | 1.1 | 1.819 | 0.046 | 2.004   | Fruit    |
| <i>Ranunculus gramineus</i>                                                                          | Ranunculaceae  | Indifferent | 62 | 31 | *   | 5      | 3.5 | 1.8 | 0.8 | 2.777 | 0.099 | 0.665   | Fruit    |
| <i>Raphanus sativus</i> (=R. <i>raphanistrum</i> )                                                   | Brassicaceae   | Indifferent | 93 | 79 | *   | 3      | 1.4 | 0.7 | 0.4 | 0.211 | 0.088 | 51.872  | Seed     |



Table S1 (continued)

| Species                                                                | Family          | Photoblasty | Ld | Lp | SIG | Source | L   | W   | T   | VOL    | VAR   | AMP      | Diaspore |
|------------------------------------------------------------------------|-----------------|-------------|----|----|-----|--------|-----|-----|-----|--------|-------|----------|----------|
| <i>Rheum rhaponticum</i>                                               | Polygonaceae    | Indifferent | 98 | 17 | *   | 3      | 7.5 | 6.0 | 2.8 | 66.626 | 0.067 | 1.396    | Fruit    |
| <i>Rudbeckia laciniata</i>                                             | Asteraceae      | Indifferent | 81 | 30 | *   | 3      | 4.0 | 1.1 | 0.8 | 1.771  | 0.132 | 1.464    | Fruit    |
| <i>Rumex acetosa</i>                                                   | Polygonaceae    | Indifferent | 93 | 78 | *   | 4      | 2.2 | 1.4 | 1.0 | 1.546  | 0.055 | 0.054    | Fruit    |
| <i>Rumex alpinus</i>                                                   | Polygonaceae    | Indifferent | 80 | 3  | *   | 5      | 2.5 | 1.4 | 1.0 | 1.797  | 0.066 | 0.735    | Seed     |
| <i>Rumex crispus</i>                                                   | Polygonaceae    | Positive    | 87 | 0  | *   | 4      | 0.6 | 0.3 | 0.2 | 0.021  | 0.077 | 1137.860 | Fruit    |
| <i>Rumex hydrolapathum</i>                                             | Polygonaceae    | Positive    | 93 | 0  | *   | 5      | 2.8 | 1.8 | 0.8 | 2.221  | 0.082 | 0.556    | Seed     |
| <i>Rumex obtusifolius</i>                                              | Polygonaceae    | Positive    | 93 | 0  | *   | 4      | 2.1 | 0.7 | 0.4 | 0.275  | 0.129 | 98.995   | Fruit    |
| <i>Salvia aethiopis</i>                                                | Lamiaceae       | Indifferent | 68 | 27 | *   | 5      | 1.7 | 1.5 | 1.0 | 1.345  | 0.029 | 1.039    | Fruit    |
| <i>Salvia horminum</i> (=S. <i>viridis</i> )                           | Lamiaceae       | Indifferent | 93 | 0  | *   | 5      | 2.5 | 1.4 | 1.0 | 1.797  | 0.066 | 0.908    | Fruit    |
| <i>Salvia officinalis</i>                                              | Lamiaceae       | Indifferent | 89 | 77 | *   | 5      | 2.0 | 1.8 | 0.8 | 1.587  | 0.064 | 1.490    | Fruit    |
| <i>Salvia pratensis</i>                                                | Lamiaceae       | Indifferent | 47 | 14 | *   | 5      | 1.8 | 1.4 | 0.9 | 1.226  | 0.039 | 0.443    | Fruit    |
| <i>Salvia sclarea</i>                                                  | Lamiaceae       | Indifferent | 88 | 90 | ns  | 5      | 2.2 | 1.5 | 1.1 | 1.819  | 0.046 | 0.346    | Fruit    |
| <i>Salvia splendens</i>                                                | Lamiaceae       | Indifferent | 29 | 25 | ns  | 4      | 3.0 | 1.8 | 0.8 | 2.380  | 0.087 | 0.482    | Fruit    |
| <i>Salvia verticillata</i>                                             | Lamiaceae       | Indifferent | 60 | 8  | *   | 5      | 1.6 | 1.1 | 0.7 | 0.629  | 0.055 | 1.588    | Fruit    |
| <i>Saxifraga decipiens</i> (=S. <i>rosacea</i> )                       | Saxifragaceae   | Positive    | 95 | 43 | *   | 5      | 0.6 | 0.4 | 0.2 | 0.022  | 0.076 | 0.935    | Seed     |
| <i>Saxifraga rotundifolia</i>                                          | Saxifragaceae   | Positive    | 72 | 10 | *   | 5      | 0.5 | 0.3 | 0.2 | 0.013  | 0.073 | 1.497    | Seed     |
| <i>Saxifraga umbrosa</i>                                               | Saxifragaceae   | Positive    | 40 | 0  | *   | 5      | 0.6 | 0.3 | 0.2 | 0.016  | 0.090 | 2.015    | Seed     |
| <i>Saxifraga umbrosa</i> var. <i>primuloides</i> (=S. <i>umbrosa</i> ) | Saxifragaceae   | Positive    | 57 | 0  | *   | 5      | 0.6 | 0.3 | 0.2 | 0.016  | 0.090 | 2.015    | Seed     |
| <i>Scabiosa atropurpurea</i>                                           | Dipsacaceae     | Indifferent | 42 | 32 | *   | 4      | 5.0 | 4.0 | 1.9 | 19.630 | 0.068 | 0.879    | Fruit    |
| <i>Scabiosa ochroleuca</i>                                             | Dipsacaceae     | Positive    | 77 | 10 | *   | 5      | 3.6 | 2.4 | 1.1 | 5.079  | 0.079 | 0.664    | Fruit    |
| <i>Secale cereale</i>                                                  | Poaceae         | Indifferent | 98 | 98 | ns  | 4      | 5.7 | 2.2 | 1.0 | 6.940  | 0.121 | 1.705    | Fruit    |
| <i>Secale silvestre</i> (=S. <i>silvestre</i> )                        | Poaceae         | Indifferent | 80 | 77 | ns  | 4      | 8.0 | 1.6 | 0.7 | 5.017  | 0.164 | 0.759    | Fruit    |
| <i>Senecio cruentus</i>                                                | Asteraceae      | Negative    | 74 | 83 | ns  | 3      | 1.6 | 0.7 | 0.4 | 0.242  | 0.100 | 0.670    | Fruit    |
| <i>Senecio fuchsii</i>                                                 | Asteraceae      | Positive    | 56 | 6  | *   | 4      | 3.7 | 0.7 | 0.4 | 0.586  | 0.160 | 1.061    | Fruit    |
| <i>Senecio nemorensis</i>                                              | Asteraceae      | Positive    | 73 | 0  | *   | 5      | 3.6 | 0.8 | 0.5 | 0.761  | 0.150 | 0.862    | Fruit    |
| <i>Senecio vulgaris</i>                                                | Asteraceae      | Positive    | 60 | 0  | *   | 4      | 2.0 | 0.5 | 0.3 | 0.152  | 0.145 | 0.833    | Fruit    |
| <i>Setaria glauca</i> (=Pennisetum <i>glauca</i> /S. <i>pumila</i> )   | Poaceae         | Indifferent | 85 | 83 | ns  | 5      | 2.1 | 1.5 | 1.0 | 1.721  | 0.042 | 2.312    | Fruit    |
| <i>Setaria viridis</i>                                                 | Poaceae         | Indifferent | 94 | 86 | *   | 3      | 2.0 | 0.9 | 0.6 | 0.519  | 0.095 | 5.100    | Fruit    |
| <i>Silene hayekiana</i> (=S. <i>saxifraga</i> )                        | Caryophyllaceae | Positive    | 90 | 47 | *   | 5      | 1.0 | 0.8 | 0.5 | 0.196  | 0.048 | 1.093    | Seed     |
| <i>Silene inflata</i> (=S. <i>vulgaris</i> )                           | Caryophyllaceae | Indifferent | 73 | 3  | *   | 4      | 1.0 | 0.9 | 0.5 | 0.250  | 0.041 | 27.070   | Seed     |
| <i>Silene saxifraga</i>                                                | Caryophyllaceae | Indifferent | 95 | 10 | *   | 5      | 1.0 | 0.8 | 0.5 | 0.196  | 0.048 | 1.093    | Seed     |
| <i>Silene viridiflora</i>                                              | Caryophyllaceae | Indifferent | 97 | 33 | *   | 5      | 1.0 | 0.9 | 0.5 | 0.250  | 0.041 | 1.831    | Seed     |
| <i>Sinapis alba</i>                                                    | Brassicaceae    | Indifferent | 98 | 98 | ns  | 4      | 1.6 | 1.3 | 0.8 | 0.885  | 0.039 | 9.941    | Seed     |
| <i>Sinapis arvensis</i>                                                | Brassicaceae    | Indifferent | 62 | 37 | *   | 4      | 1.1 | 1.0 | 0.6 | 0.344  | 0.039 | 6.306    | Seed     |
| <i>Solanum melongena</i>                                               | Solanaceae      | Negative    | 65 | 1  | *   | 4      | 3.3 | 2.7 | 1.3 | 5.893  | 0.067 | 2.331    | Seed     |
| <i>Solidago virga aurea</i> (=S. <i>virgaurea</i> )                    | Asteraceae      | Negative    | 60 | 67 | ns  | 4      | 3.6 | 0.6 | 0.4 | 0.409  | 0.168 | 1.203    | Fruit    |

Table S1 (continued)

| Species                                                                                      | Family           | Photoblasty | Ld | Lp | SIG | Source | L    | W   | T   | VOL    | VAR   | AMP      | Diaspore |
|----------------------------------------------------------------------------------------------|------------------|-------------|----|----|-----|--------|------|-----|-----|--------|-------|----------|----------|
| <i>Sonchus arvensis</i>                                                                      | Asteraceae       | Indifferent | 25 | 5  | *   | 5      | 1.9  | 0.5 | 0.3 | 0.142  | 0.139 | 21.660   | Fruit    |
| <i>Sonchus oleraceus</i> *                                                                   | Asteraceae       | Positive    | 33 | 0  | *   | 5      | 2.9  | 0.6 | 0.3 | 0.212  | 0.166 | 5.677    | Fruit    |
| <i>Spergula arvensis</i> (=S. maxima)                                                        | Caryophyllaceae  | Indifferent | 50 | 32 | *   | 4      | 0.2  | 0.1 | 0.1 | 0.000  | 0.073 | 5450.105 | Seed     |
| <i>Tagetes erectus</i>                                                                       | Asteraceae       | Positive    | 87 | 36 | *   | 3      | 7.0  | 0.8 | 0.6 | 1.641  | 0.181 | 1.396    | Fruit    |
| <i>Tanacetum vulgare</i>                                                                     | Asteraceae       | Positive    | 75 | 19 | *   | 4      | 1.3  | 0.5 | 0.3 | 0.098  | 0.112 | 4.287    | Fruit    |
| <i>Taraxacum officinale</i>                                                                  | Asteraceae       | Positive    | 87 | 2  | *   | 3      | 2.6  | 0.5 | 0.3 | 0.167  | 0.166 | 20.316   | Fruit    |
| <i>Tragopogon major</i> (=T. dubius)                                                         | Asteraceae       | Negative    | 92 | 2  | *   | 4      | 25.2 | 0.8 | 0.4 | 3.583  | 0.213 | 12.515   | Fruit    |
| <i>Tragopogon orientalis</i>                                                                 | Asteraceae       | Indifferent | 90 | 0  | *   | 4      | 10.0 | 1.5 | 0.7 | 5.512  | 0.177 | 0.542    | Fruit    |
| <i>Triticum vulgare</i> cv. Grana (=T. aestivum)                                             | Poaceae          | Indifferent | 96 | 94 | ns  | 4      | 6.0  | 2.8 | 1.3 | 11.531 | 0.106 | 3.412    | Fruit    |
| <i>Tussilago farfara</i>                                                                     | Asteraceae       | Indifferent | 92 | 0  | *   | 4      | 3.9  | 0.4 | 0.2 | 0.206  | 0.186 | 0.986    | Fruit    |
| <i>Urtica dioica</i>                                                                         | Urticaceae       | Positive    | 47 | 0  | *   | 5      | 0.9  | 0.7 | 0.4 | 0.134  | 0.051 | 8.444    | Fruit    |
| <i>Veronica austriaca</i> (=V. jacquinii/V. sennenii/V. tenuifolia/V. teucrium/V. orsiniana) | Scrophulariaceae | Indifferent | 90 | 28 | *   | 5      | 0.9  | 0.3 | 0.2 | 0.024  | 0.125 | 111.683  | Seed     |
| <i>Veronica fruticans</i>                                                                    | Scrophulariaceae | Positive    | 57 | 13 | *   | 5      | 0.9  | 0.4 | 0.2 | 0.043  | 0.100 | 15.427   | Seed     |
| <i>Veronica gentianoides</i>                                                                 | Scrophulariaceae | Positive    | 92 | 65 | *   | 5      | 1.6  | 1.6 | 1.1 | 1.456  | 0.023 | 0.090    | Seed     |
| <i>Veronica incana</i> (=Pseudolysimachion incanum/P. spicatum/V. spicata)                   | Scrophulariaceae | Indifferent | 75 | 70 | ns  | 5      | 0.6  | 0.5 | 0.3 | 0.045  | 0.048 | 5.731    | Seed     |
| <i>Veronica longifolia</i> (=Pseudolysimachion longifolium)                                  | Scrophulariaceae | Indifferent | 78 | 23 | *   | 5      | 0.8  | 0.4 | 0.2 | 0.039  | 0.085 | 5.095    | Seed     |
| <i>Veronica peduncularis</i>                                                                 | Scrophulariaceae | Positive    | 68 | 29 | *   | 5      | 1.7  | 1.2 | 0.8 | 0.813  | 0.051 | 0.604    | Seed     |
| <i>Veronica spicata</i> (=Pseudolysimachion incanum/P. spicatum/V. incana)                   | Scrophulariaceae | Positive    | 93 | 20 | *   | 5      | 0.6  | 0.5 | 0.3 | 0.045  | 0.048 | 5.731    | Seed     |
| <i>Veronica teucrium</i> (=V. austriaca/V. jacquinii/V. sennenii/V. tenuifolia/V. orsiniana) | Scrophulariaceae | Indifferent | 90 | 28 | *   | 5      | 0.9  | 0.3 | 0.2 | 0.024  | 0.125 | 111.683  | Seed     |
| <i>Veronica triphyllos</i>                                                                   | Scrophulariaceae | Indifferent | 84 | 7  | *   | 4      | 1.3  | 1.0 | 0.6 | 0.411  | 0.048 | 4.247    | Seed     |
| <i>Vicia faba</i> (=Faba bona)                                                               | Fabaceae         | Negative    | 93 | 15 | *   | 4      | 5.0  | 3.5 | 1.6 | 15.021 | 0.076 | 161.662  | Seed     |
| <i>Vicia hirsuta</i>                                                                         | Fabaceae         | Indifferent | 33 | 28 | ns  | 4      | 2.1  | 1.8 | 0.8 | 1.666  | 0.065 | 1.297    | Seed     |
| <i>Zea mays</i> (hybrid S54 x S72) (=Z. mays)                                                | Poaceae          | Indifferent | 90 | 93 | ns  | 4      | 6.5  | 3.5 | 1.6 | 19.538 | 0.095 | 32.766   | Fruit    |

Synonymy from the Seed Volume Dataset (update 04) and World Flora Online (<http://www.worldfloraonline.org>, last accessed in 19 February 2020).

Source in the main text using the same number.

In species with \* thickness was estimated from length, width and volume (see reference [8] in the main text). L, W, T (in mm) and VOL (in mm<sup>3</sup>) from Seed Volume Dataset (update 04). For determinations of volumes see references [21,22], for departure from sphericity and diaspores type see reference [8], always in the main text.
